# Supplementary material for: The Effects of Psychotherapy on Depression Among Racial-Ethnic Minority Groups: A Metaregression Analysis
Source: Atypon-hosted journal article supplement (doi:10.1176/appi.ps.201300165), 2014-02-18
Supplement: 612_ds001.pdf [file 612_ds001.pdf]

## 56 Studies Used in Meta-Analysis

- Arean PA, Perri MG, Nezu AM, et al: Comparative effectiveness of social problem-solving therapy and reminiscence therapy as treatments for depression in older adults. *Journal of Consulting and Clinical Psychology*; 61:1003-1010, 1993.
- Baker AL, Kavanagh DJ, Kay-Lambkin FJ, et al: Randomized controlled trial of cognitive-behavioural therapy for coexisting depression and alcohol problems: short-term outcome. *Addiction* 105:87-99, 2010.
- Barber JP, Barrett MS, Gallop R, et al: Short-term dynamic psychotherapy versus pharmacotherapy for major depressive disorder: a randomized, placebo-controlled trial. *The Journal of clinical psychiatry* 73:66-73, 2011.
- Barrett JE, Williams Jr JW, Oxman TE, et al: Treatment of dysthymia and minor depression in primary care: a randomized trial in patients aged 18 to 59 years. *The Journal of Family Practice* 50:405-412, 2001.
- Beeber LS, Holditch-Davis D, Perreira K, et al: Short-term in-home intervention reduces depressive symptoms in Early Head Start Latina mothers of infants and toddlers. *Research in nursing & health* 33:60-76, 2010.
- Bohlmeijer ET, Fledderus M, Rokx T, et al: Efficacy of an early intervention based on acceptance and commitment therapy for adults with depressive symptomatology: Evaluation in a randomized controlled trial. *Behaviour research and therapy* 49:62-67, 2011.
- Carpenter KM, Smith JL, Aharonovich E, et al: Developing therapies for depression in drug dependence: results of a stage 1 therapy study. *The American journal of drug and alcohol abuse* 34:642-652, 2008.
- Chesney MA, Chambers DB, Taylor JM, et al: Coping effectiveness training for men living with HIV: results from a randomized clinical trial testing a group-based intervention. *Psychosomatic Medicine* 65:1038-1046, 2003.
- Cohen S, O'Leary KD, Foran H: A randomized clinical trial of a brief, problem-focused couple therapy for depression. *Behavior therapy* 41:433-446, 2010.
- Cramer H, Salisbury C, Conrad J, et al: Group cognitive behavioural therapy for women with depression: pilot and feasibility study for a randomised controlled trial using mixed methods. *BMC psychiatry* 11:82, 2011.
- Dimidjian S, Hollon SD, Dobson KS, et al: Randomized trial of behavioral activation, cognitive therapy, and antidepressant medication in the acute treatment of adults with major depression. *Journal of consulting and clinical psychology* 74:658-670, 2006.
- Dobkin RD, Menza M, Allen LA, et al: Cognitive behavior therapy for depression in Parkinson's disease: a randomized controlled trial. *The American journal of psychiatry* 168:1066-1074, 2011.
- Duarte PS, Miyazaki MC, Blay SL, et al: Cognitive-behavioral group therapy is an effective treatment for major depression in hemodialysis patients. *Kidney international* 76:414-421, 2009.
- Dunn NJ, Rehm LP, Schillaci J, et al: A randomized trial of self-management and psychoeducational group therapies for comorbid chronic posttraumatic stress disorder and depressive disorder. *Journal of traumatic stress* 20:221-237, 2007.

- Dwight-Johnson M, Aisenberg E, Golinelli D, et al: Telephone-based cognitive-behavioral therapy for Latino patients living in rural areas: a randomized pilot study. *Psychiatric services* 62:936-942, 2011.
- Elkin I, Shea MT, Watkins JT, et al: National Institute of Mental Health treatment of depression collaborative research program. General effectiveness of treatments. *Archives of General Psychiatry* 46:971-982, 1989.
- Evans RL, Connis RT: Comparison of brief group therapies for depressed cancer patients receiving radiation treatment. *Public Health Reports* 110:306-311, 1995.
- Freedland KE, Skala JA, Carney RM, et al: Treatment of depression after coronary artery bypass surgery: a randomized controlled trial. *Archives of General Psychiatry* 66:387-396, 2009.
- Haringsma R, Engels GI, Cuijpers P, et al: Effectiveness of the Coping With Depression (CWD) course for older adults provided by the community-based mental health care system in the Netherlands: a randomized controlled field trial. *International Psychogeriatrics* 18:307-326, 2006.
- Harley R, Sprich S, Safren S, et al: Adaptation of dialectical behavior therapy skills training group for treatment-resistant depression. *The Journal of nervous and mental disease* 196:136-143, 2008.
- Heckman TG, Sikkema KJ, Hansen N, et al: A randomized clinical trial of a coping improvement group intervention for HIV-infected older adults. *Journal of behavioral medicine* 34:102-111, 2011.
- Hogg JA, Deffenbacher JL: A comparison of cognitive and interpersonal-process group therapies in the treatment of depression among college students. *Journal of Counseling Psychology* 35:304-310, 1988.
- Jamison C, Scogin F: The outcome of cognitive bibliotherapy with depressed adults. *Journal of consulting and clinical psychology* 63:644-650, 1995.
- Kay-Lambkin FJ, Baker AL, Lewin TJ, et al: Computer-based psychological treatment for comorbid depression and problematic alcohol and/or cannabis use: a randomized controlled trial of clinical efficacy. *Addiction* 104:378-388, 2009.
- Kelly JA, Murphy DA, Bahr GR, et al: Outcome of cognitive-behavioral and support group brief therapies for depressed, HIV-infected persons. *The American journal of psychiatry* 150:1679-1696, 1993.
- King M, Sibbald B, Ward E, et al: Randomised controlled trial of non-directive counselling, cognitive-behaviour therapy and usual general practitioner care in the management of depression as well as mixed anxiety and depression in primary care. *Health Technology Assessment* 4:1-83, 2000.
- Le HN, Perry DF, Stuart EA: Randomized controlled trial of a preventive intervention for perinatal depression in high-risk Latinas. *Journal of consulting and clinical psychology* 79:135-141, 2011.
- Levin W, Campbell DR, McGovern KB, et al: A computer-assisted depression intervention in primary care. *Psychological medicine* 41:1373-1383, 2011.
- Linde JA, Simon GE, Ludman EJ, et al: A randomized controlled trial of behavioral weight loss treatment versus combined weight loss/depression treatment among women with comorbid obesity and depression. *Annals of Behavioral Medicine* 41:119-130, 2011.
- Lustman PJ, Griffith LS, Freedland KE, et al: Cognitive behavior therapy for depression in type 2 diabetes mellitus. A randomized, controlled trial. *Annals of Internal Medicine* 129:613-621, 1998.

- Milgrom J, Negri LM, Gemmill AW, et al: A randomized controlled trial of psychological interventions for postnatal depression. *British Journal of Clinical Psychology* 44:529-542, 2005.
- Milgrom J, Holt CJ, Gemmill AW, et al: Treating postnatal depressive symptoms in primary care: a randomised controlled trial of GP management, with and without adjunctive counselling. *BMC psychiatry* 11:95, 2011.
- Miller L, Weissman M: Interpersonal psychotherapy delivered over the telephone to recurrent depressives. A pilot study. *Depression and anxiety* 16:114-117, 2002.
- Miranda J, Chung JY, Green BL, et al: Treating depression in predominantly low-income young minority women: A randomized controlled trial. *JAMA: the journal of the American Medical Association* 290:57-65, 2003.
- Mohr DC, Carmody T, Erickson L, et al: Telephone-administered cognitive behavioral therapy for veterans served by community-based outpatient clinics. *Journal of consulting and clinical psychology* 79:261-265, 2011.
- Mossey JM, Knott KA, Higgins M, et al: Effectiveness of a psychosocial intervention, interpersonal counseling, for subdysthymic depression in medically ill elderly. *The Journals of Gerontology Series A: Biological Sciences and Medical Sciences* 51:M172-M178, 1996.
- Mulcahy R, Reay RE, Wilkinson RB, et al: A randomised control trial for the effectiveness of group interpersonal psychotherapy for postnatal depression. *Archives of women's mental health* 13:125-139, 2010.
- Murphy GE, Carney R, Knesevich M, et al: Cognitive behavior therapy, relaxation training, and tricyclic antidepressant medication in the treatment of depression. *Psychological reports* 77:403-420, 1995.
- Mynors-Wallis LM, Gath DH, Lloyd-Thomas AR, et al: Randomised controlled trial comparing problem solving treatment with amitriptyline and placebo for major depression in primary care. *Bmj* 310:441-445, 1995.
- Neugebauer R, Kline J, Markowitz JC, et al: Pilot randomized controlled trial of interpersonal counseling for subsyndromal depression following miscarriage. *The Journal of clinical psychiatry* 67:1299-1304, 2006.
- O'Hara MW, Stuart S, Gorman LL, et al: Efficacy of interpersonal psychotherapy for postpartum depression. *Archives of General Psychiatry* 57:1039-1045, 2000.
- Ransom D, Heckman TG, Anderson T, et al: Telephone-delivered, interpersonal psychotherapy for HIV-infected rural persons with depression: a pilot trial. *Psychiatric services* 59:871-877, 2008.
- Rohan KJ, Roecklein KA, Tierney Lindsey K, et al: A randomized controlled trial of cognitive-behavioral therapy, light therapy, and their combination for seasonal affective disorder. *Journal of consulting and clinical psychology* 75:489-500, 2007.
- Safren SA, O'Cleirigh C, Tan JY, et al: A randomized controlled trial of cognitive behavioral therapy for adherence and depression (CBT-AD) in HIV-infected individuals. *Health Psychology* 28:1-10, 2009.
- Schmidt MM, Miller WR: Amount of therapist contact and outcome in a multidimensional depression treatment program. *Acta Psychiatrica Scandinavica* 67:319-332, 1983.
- Schulberg HC, Block MR, Madonia MJ, et al: Treating major depression in primary care practice: eight-month clinical outcomes. *Archives of General Psychiatry* 53:913-919, 1996.

- Serfaty MA, Haworth D, Blanchard M, et al: Clinical effectiveness of individual cognitive behavioral therapy for depressed older people in primary care: a randomized controlled trial. *Archives of General Psychiatry* 66:1332-1340, 2009.
- Snarski M, Scogin F, DiNapoli E, et al: The effects of behavioral activation therapy with inpatient geriatric psychiatry patients. *Behavior therapy* 42:100-108, 2011.
- Spinelli MG, Endicott J: Controlled clinical trial of interpersonal psychotherapy versus parenting education program for depressed pregnant women. *American Journal of Psychiatry* 160:555-562, 2003.
- Swartz HA, Frank E, Zuckoff A, et al: Brief interpersonal psychotherapy for depressed mothers whose children are receiving psychiatric treatment. *The American journal of psychiatry* 165:1155-1162, 2008.
- Talbot NL, Chaudron LH, Ward EA, et al: A randomized effectiveness trial of interpersonal psychotherapy for depressed women with sexual abuse histories. *Psychiatric services* 62:374-380, 2011.
- Taylor CB, Conrad A, Wilhelm FH, et al: Does improving mood in depressed patients alter factors that may affect cardiovascular disease risk? *Journal of psychiatric research* 43:1246-1252, 2009.
- van Bastelaar KMP, Pouwer F, Cuijpers P, et al: Web-based depression treatment for type 1 and type 2 diabetic patients: a randomized, controlled trial. *Diabetes Care* 34:320-325, 2011.
- Warmerdam L, Van Straten A, Twisk J, et al: Internet-based treatment for adults with depressive symptoms: randomized controlled trial. *Journal of medical Internet research* 10:e44, 2008.
- Wiklund I, Mohlkert P, Edman G: Evaluation of a brief cognitive intervention in patients with signs of postnatal depression: a randomized controlled trial. *Acta obstetricia et gynecologica Scandinavica* 89:1100-1104, 2010.
- Williams Jr JW, Barrett J, Oxman T, et al: Treatment of dysthymia and minor depression in primary care. *JAMA: the journal of the American Medical Association* 284:1519-1526, 2000.

## Appendix B

### Flow chart of the selected studies

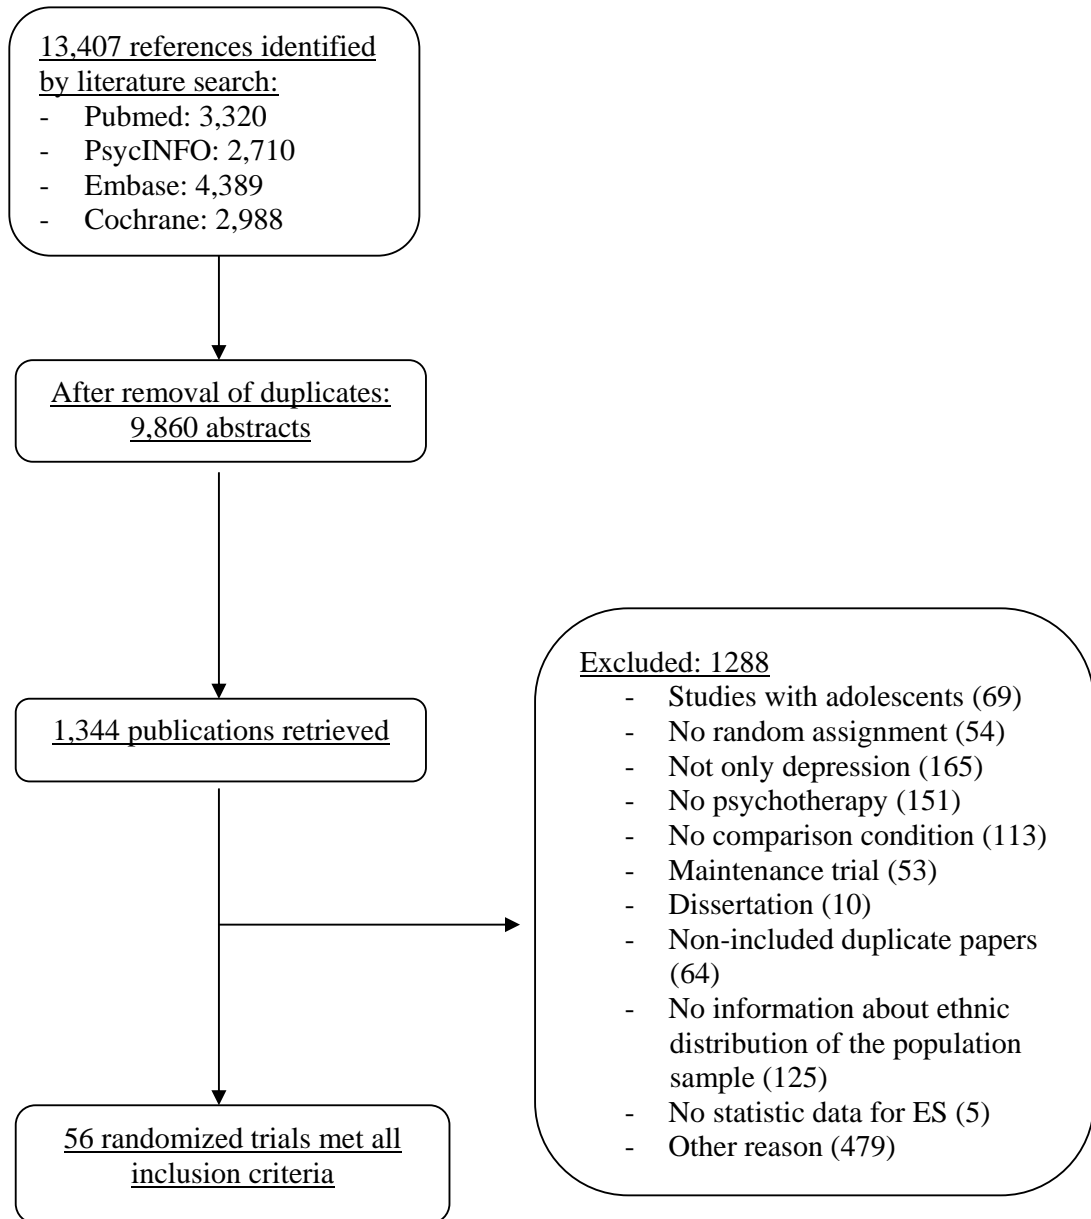

## Appendix C

### Characteristics of selected randomized controlled trials

% Ethnicity

| Study                                           | Recruitment | Target group    | Definitive<br>on of<br>depression<br>Conditions | Form at                                                                                            | N   | Nati<br>ve | Blac<br>k | Asia<br>n | Lati<br>n | Native-<br>Americ<br>an | Oth<br>er | Count<br>ry | Rando<br>m seq | Allocati<br>on conc | Blin<br>d<br>asse<br>ss | IT<br>T | Ris<br>k<br>of<br>bia<br>s |                         |
|-------------------------------------------------|-------------|-----------------|-------------------------------------------------|----------------------------------------------------------------------------------------------------|-----|------------|-----------|-----------|-----------|-------------------------|-----------|-------------|----------------|---------------------|-------------------------|---------|----------------------------|-------------------------|
|                                                 |             |                 |                                                 |                                                                                                    |     |            |           |           |           |                         |           |             |                |                     |                         |         |                            | Major<br>depressi<br>on |
| Arean et al., 1993                              | Community   | Older<br>adults | Major<br>depressi<br>on                         | 1. PST<br>2. RT<br>3. Waiting-<br>list                                                             | Grp | 19         | 77.3      | 16        | 1.3       | 6.7                     | 0         | 0           | USA            | -                   | -                       | +       | -                          | 1                       |
| Baker, Kavanagh,<br>Kay-Lambkin et al.,<br>2010 | Community   | Other           | Other<br>definiti<br>on                         | 1. CBT<br>(depression<br>focus)<br>2. CBT<br>(alcohol<br>focus)<br>3. CBT<br>(integrated<br>focus) | Ind | 71         | 79        | 0         | 0         | 0                       | 0         | 21          | AU             | +                   | +                       | +       | +                          | 4                       |

|                                               |           |        | 4. Brief Intervention (control)         |                  |     |    |      |     |     |     |   |   |     |   |   |   |   |   |
|-----------------------------------------------|-----------|--------|-----------------------------------------|------------------|-----|----|------|-----|-----|-----|---|---|-----|---|---|---|---|---|
|                                               |           |        | Major depressi                          |                  |     | 70 |      |     |     |     |   |   |     |   |   |   |   |   |
| Barber, Barrett, Gallop et al. 2011           | Community | Adults | on                                      | 1. SET           | Ind | 51 | 48   | 45  | 2   | 5   | 0 | 0 | USA | + | + | + | + | 4 |
|                                               |           |        |                                         | 2. PBO+          |     | 50 |      |     |     |     |   |   |     |   |   |   |   |   |
| Barrett, Williams, Oxman et al., 2001         | Clinical  | Adults | Mood disorder                           | 1. PST           | Ind | 29 | 90   | 3   | 3   | 1   | 3 | 0 | USA | + | + | + | + | 4 |
|                                               |           |        |                                         | 2. PBO           |     | 32 |      |     |     |     |   |   |     |   |   |   |   |   |
|                                               |           |        | Specific program for low-income mothers | Other definiti   |     |    |      |     |     |     |   |   |     |   |   |   |   |   |
| Beeber, Holditch-Davis, Perreira et al., 2010 |           | Other  | on                                      | 1. IPT           | Ind | 34 | 0    | 0   | 0   | 100 | 0 | 0 | USA | + | + | + | - | 3 |
|                                               |           |        |                                         | 2. CAU           |     | 37 |      |     |     |     |   |   |     |   |   |   |   |   |
| Bohlmeijer, Fledderus, Rokx et al., 2011      | Community | Adults | Other definiti                          | 1. ACT           | Grp | 49 | 85   | 0   | 0   | 0   | 0 | 8 | NL  | + | + | - | + | 3 |
|                                               |           |        |                                         | 2. Waiting-list  |     | 44 |      |     |     |     |   |   |     |   |   |   |   |   |
| Carpenter, Smith, Aharonovic et al., 2008     | Clinical  | Other  | Mood disorder                           | 1. BAT           | Ind | 18 | 81.6 | 7.9 | 0.0 | 5   | 0 | 0 | USA | - | - | - | + | 1 |
|                                               |           |        |                                         | 2. REL (control) |     | 20 |      |     |     |     |   |   |     |   |   |   |   |   |

|                                              |                |                    |                         |                               |     |    |      |   |   |     |   |      |     |   |   |   |   |   |
|----------------------------------------------|----------------|--------------------|-------------------------|-------------------------------|-----|----|------|---|---|-----|---|------|-----|---|---|---|---|---|
| Chesney,<br>Chambers, Taylor<br>et al., 2003 | Community      | General<br>medical | Other<br>definiti<br>on | 1. CET<br>2. Waiting-<br>list | Grp | 46 | 82   | 0 | 0 | 0   | 0 | 18   | USA | - | - | + | - | 1 |
| Cohen, O'Leary &<br>Foran, 2010              | Community      | Adults             | Mood<br>disorder        | 1. BCT<br>2. Waiting-<br>list | Ind | 16 | 88.2 | 3 | 3 | 5.7 | 0 | 0    | USA | - | - | + | - | 1 |
| Cramer, Salisbury,<br>Conrad et al., 2011    | Community      | Other              | Other<br>definiti<br>on | 1. CBT<br>2. CAU              | Grp | 48 | 87.7 | 0 | 0 | 0   | 0 | 11   | UK  | + | + | - | + | 3 |
| Dimidjian, Hollon,<br>Dobson et al., 2006    | Community      | Adults             | Major<br>depressi<br>on | 1. CBT<br>2. BAT<br>3. PBO    | Ind | 45 | 81.7 | 0 | 0 | 0   | 0 | 18.3 | USA | + | + | + | + | 4 |
| Dobkin, Menza,<br>Allen et al., 2011         | Community      | General<br>medical | Mood<br>disorder        | 1. CBT<br>2. CAU              | Ind | 41 | 93   | 1 | 5 | 4   | 0 | 1    | USA | + | + | + | + | 4 |
| Duarte, Miyazaki,<br>Blay et al., 2009       | Dialysis units | General<br>medical | Major<br>depressi<br>on | 1. CBT<br>2. CAU              | Grp | 41 | 76.5 | 0 | 0 | 0   | 0 | 23.5 | BR  | + | + | + | + | 4 |



|                                                            |                                                   |                    |                         |                                                            |     |                |      |      |   |          |   |      |     |   |   |   |   |   |
|------------------------------------------------------------|---------------------------------------------------|--------------------|-------------------------|------------------------------------------------------------|-----|----------------|------|------|---|----------|---|------|-----|---|---|---|---|---|
| Dunn, Rehm,<br>Schillaci et al.,<br>2007                   | Clinical                                          | Other              | Mood<br>disorder        | 1. SEMT<br>2. CAU                                          | Grp | 33<br>44       | 55.4 | 27.7 | 0 | 11.<br>9 | 0 | 5    | USA | + | + | + | + | 4 |
| Dwight-Johnson,<br>Aisenberg,<br>Golinelli et al.,<br>2011 | Rural health<br>center                            | Other              | Other<br>definiti<br>on | 1. CBT<br>2. CAU                                           | Ind | 50<br>51       | 4    | 0    | 0 | 91       | 0 | 5    | USA | - | - | + | + | 2 |
| Elkin, Shea,<br>Watkins et al., 1989                       | Clinical                                          | Adults             | Major<br>depressi<br>on | 1. CBT<br>2. IPT<br>3. PBO+                                | Ind | 59<br>61<br>62 | 89   | 0    | 0 | 0        | 0 | 11   | USA | + | + | + | + | 4 |
| Evans & Connis,<br>1995                                    | List of<br>patients for<br>radiation<br>treatment | General<br>medical | Other<br>definiti<br>on | 1. CBT<br>2. SUB<br>3. Radiation<br>treatment<br>(control) | Grp | 27<br>21<br>24 | 59.7 | 11.1 | 0 | 0        | 0 | 29.2 | USA | - | - | + | - | 1 |
| Freedland, Skala,<br>Carney et al., 2009                   | Outpatient<br>research clinic                     | General<br>medical | Mood<br>disorder        | 1. CBT<br>2. SUB                                           | Ind | 41<br>42       | 81.3 | 18.7 | 0 | 0        | 0 | 0    | USA | + | + | + | + | 4 |

|                                                |           |                           |                         |                                          |     |    |      |    |   |   |   |      |     |   |   |   |   |   |  |
|------------------------------------------------|-----------|---------------------------|-------------------------|------------------------------------------|-----|----|------|----|---|---|---|------|-----|---|---|---|---|---|--|
|                                                |           |                           |                         | 3. CAU                                   |     | 40 |      |    |   |   |   |      |     |   |   |   |   |   |  |
| Haringsma, Engels,<br>Cuijpers et al.,<br>2006 | Community | Older<br>adults           | Other<br>definiti<br>on | 1. CBT<br>2. Waiting-<br>list            | Grp | 52 | 90   | 0  | 0 | 0 | 0 | 10   | NL  | - | - | + | + | 2 |  |
|                                                |           |                           |                         |                                          |     | 58 |      |    |   |   |   |      |     |   |   |   |   |   |  |
| Harley, Sprich,<br>Safren et al., 2008         | Clinical  | Adults                    | Major<br>depressi<br>on | 1. DBT<br>2. Waiting-<br>list            | Grp | 10 | 83.3 | 0  | 0 | 0 | 0 | 16.7 | USA | + | + | + | - | 3 |  |
|                                                |           |                           |                         |                                          |     | 9  |      |    |   |   |   |      |     |   |   |   |   |   |  |
| Heckman, Sikkema,<br>Hansen et al., 2011       | Community | General<br>medical        | Other<br>definiti<br>on | 1. COP<br>2. IPS<br>3. ITUR<br>(control) | Grp | 4  | 52   | 48 | 0 | 0 | 0 | 0    | USA | + | + | - | + | 3 |  |
|                                                |           |                           |                         |                                          |     | 10 |      |    |   |   |   |      |     |   |   |   |   |   |  |
|                                                |           |                           |                         |                                          |     | 5  |      |    |   |   |   |      |     |   |   |   |   |   |  |
|                                                |           |                           |                         |                                          |     | 86 |      |    |   |   |   |      |     |   |   |   |   |   |  |
| Hogg &<br>Deffenbacher, 1988                   | Clinical  | Student<br>populati<br>on | Other<br>definiti<br>on | 1. CBT<br>2. IP<br>3. Waiting-<br>list   | Grp | 13 | 91.9 | 0  | 0 | 0 | 0 | 8.1  | USA | - | - | + | - | 1 |  |
|                                                |           |                           |                         |                                          |     | 14 |      |    |   |   |   |      |     |   |   |   |   |   |  |
|                                                |           |                           |                         |                                          |     | 10 |      |    |   |   |   |      |     |   |   |   |   |   |  |

|                                              |           |                    |                         |                                                                                              |     |    |      |      |   |   |   |     |     |   |   |   |   |   |
|----------------------------------------------|-----------|--------------------|-------------------------|----------------------------------------------------------------------------------------------|-----|----|------|------|---|---|---|-----|-----|---|---|---|---|---|
| Jamison & Scogin,<br>1995                    | Community | Adults             | Major<br>depressi<br>on | 1. CBT<br>2. Waiting-<br>list                                                                | Grp | 33 | 85   | 15   | 0 | 0 | 0 | 0   | USA | - | - | - | - | 0 |
|                                              |           |                    |                         |                                                                                              |     | 39 |      |      |   |   |   |     |     |   |   |   |   |   |
| Kay-Lambkin,<br>Baker, Lewin et al.,<br>2009 | Community | Other              | Other<br>definiti<br>on | 1. CBT (by<br>therapist)<br>2. CBT (by<br>computer)<br>3. Brief<br>intervention<br>(control) | Ind | 21 | 93   | 0    | 0 | 0 | 0 | 7   | AU  | + | + | + | + | 3 |
|                                              |           |                    |                         |                                                                                              |     | 22 |      |      |   |   |   |     |     |   |   |   |   |   |
|                                              |           |                    |                         |                                                                                              |     | 24 |      |      |   |   |   |     |     |   |   |   |   |   |
| Kelly, Murphy,<br>Bahr et al., 1993          | Community | General<br>medical | Other<br>definiti<br>on | 1. CBT<br>2. SUB<br>3.<br>Comparison<br>condition                                            | Grp | 27 | 61.8 | 29.4 | 0 | 0 | 0 | 8.8 | USA | - | - | + | - | 1 |
|                                              |           |                    |                         |                                                                                              |     | 14 |      |      |   |   |   |     |     |   |   |   |   |   |
|                                              |           |                    |                         |                                                                                              |     | 27 |      |      |   |   |   |     |     |   |   |   |   |   |
| King, Sibbald,<br>Ward et al., 2000          | Clinical  | Adults             | Other<br>definiti<br>on | 1. CBT<br>2. SUB<br>3. CAU                                                                   | Ind | 63 | 91.2 | 0    | 0 | 0 | 0 | 8.8 | UK  | + | + | + | + | 4 |
|                                              |           |                    |                         |                                                                                              |     | 67 |      |      |   |   |   |     |     |   |   |   |   |   |
|                                              |           |                    |                         |                                                                                              |     | 67 |      |      |   |   |   |     |     |   |   |   |   |   |

|                                                 |                                         |                      |                         |                        |     |    |      |     |     |     |     |      |     |   |   |   |   |   |
|-------------------------------------------------|-----------------------------------------|----------------------|-------------------------|------------------------|-----|----|------|-----|-----|-----|-----|------|-----|---|---|---|---|---|
| Le, Perry & Stuart,<br>2011                     | Other                                   | Other                | Other<br>definiti<br>on | 1. CBT                 | Grp | 2  | 0    | 0   | 0   | 100 | 0   | 0    | USA | + | + | - | + | 3 |
|                                                 |                                         |                      |                         | 2. CAU                 |     | 10 |      |     |     |     |     |      |     |   |   |   |   |   |
|                                                 |                                         |                      |                         |                        |     | 5  |      |     |     |     |     |      |     |   |   |   |   |   |
| Levin, Campbell,<br>McGovern et al.,<br>2011    | Clinical                                | Adults               | Other<br>definiti<br>on | 1. CBT                 | Grp | 99 | 90.1 | 2.1 | 0.5 | 3.1 | 2.1 | 2.1  | USA | + | + | + | + | 4 |
|                                                 |                                         |                      |                         | 2. CAU                 |     | 91 |      |     |     |     |     |      |     |   |   |   |   |   |
| Linde, Simon,<br>Ludman et al., 2011            | Mixed-model<br>health care<br>system    | Other                | Major<br>depressi<br>on | 1. CBT                 | Grp | 1  | 78.5 | 0   | 0   | 0   | 0   | 21.1 | USA | + | + | + | + | 4 |
|                                                 |                                         |                      |                         | 2. BWL<br>(control)    |     | 10 |      |     |     |     |     |      |     |   |   |   |   |   |
|                                                 |                                         |                      |                         |                        |     | 2  |      |     |     |     |     |      |     |   |   |   |   |   |
| Lustman, Griffith,<br>Freedland et al.,<br>1998 | Community                               | General<br>medical   | Major<br>depressi<br>on | 1. CBT                 | Ind | 24 | 81   | 0   | 0   | 0   | 0   | 19   | USA | + | + | + | + | 4 |
|                                                 |                                         |                      |                         | 2. CAU                 |     | 27 |      |     |     |     |     |      |     |   |   |   |   |   |
| Milgrom, Negri,<br>Gemmill et al.,<br>2005      | Maternal and<br>child health<br>centres | Women<br>with<br>PPD | Mood<br>disorder        | 1. CBT                 | Grp | 46 | 97.1 | 0   | 0   | 0   | 0   | 2.9  | USA | - | + | + | + | 3 |
|                                                 |                                         |                      |                         | 2. SUB<br>(group)      |     | 47 |      |     |     |     |     |      |     |   |   |   |   |   |
|                                                 |                                         |                      |                         | 3. SUB<br>(individual) |     | 66 |      |     |     |     |     |      |     |   |   |   |   |   |

|                      |               |        |          |              |     |    |      |      |   |     |   |      |     |   |   |   |   |   |  |
|----------------------|---------------|--------|----------|--------------|-----|----|------|------|---|-----|---|------|-----|---|---|---|---|---|--|
|                      |               |        |          | 4. CAU       |     | 63 |      |      |   |     |   |      |     |   |   |   |   |   |  |
|                      | General       |        |          |              |     |    |      |      |   |     |   |      |     |   |   |   |   |   |  |
|                      | practices and |        |          |              |     |    |      |      |   |     |   |      |     |   |   |   |   |   |  |
| Milgrom, Holt,       | maternal and  | Women  | Other    |              |     |    |      |      |   |     |   |      |     |   |   |   |   |   |  |
| Gemmill et al.,      | child health  | with   | definiti | 1. CBT (by   | Ind | 22 | 83.8 | 0    | 0 | 0   | 0 | 16.2 | AU  | + | + | - | + | 3 |  |
| 2011                 | centres       | PPD    | on       | nurse)       |     |    |      |      |   |     |   |      |     |   |   |   |   |   |  |
|                      |               |        |          | 2. CBT (by   |     |    |      |      |   |     |   |      |     |   |   |   |   |   |  |
|                      |               |        |          | psychologist |     |    |      |      |   |     |   |      |     |   |   |   |   |   |  |
|                      |               |        |          | )            |     | 23 |      |      |   |     |   |      |     |   |   |   |   |   |  |
|                      |               |        |          | 3. CAU       |     | 23 |      |      |   |     |   |      |     |   |   |   |   |   |  |
|                      | Ongoing       |        | Other    |              |     |    |      |      |   |     |   |      |     |   |   |   |   |   |  |
|                      | longitudinal  |        | definiti |              |     |    |      |      |   |     |   |      |     |   |   |   |   |   |  |
| Miller &             | study         | Adults | on       | 1. IPT       | Ind | 15 | 36.7 | 26.7 | 0 | 30  | 0 | 6.7  | USA | - | - | + | + | 2 |  |
| Weissman, 2002       |               |        |          | 2. CAU       |     | 15 |      |      |   |     |   |      |     |   |   |   |   |   |  |
|                      | Special       |        | Major    |              |     |    |      |      |   |     |   |      |     |   |   |   |   |   |  |
|                      | programs in   |        | depressi |              |     |    |      |      |   | 50. |   |      |     |   |   |   |   |   |  |
| Miranda, Chung,      | suburban area | Other  | on       | 1. CBT       | Grp | 90 | 6    | 43.8 | 0 | 2   | 0 | 0    | USA | + | + | + | + | 4 |  |
| Green et al., 2003   |               |        |          | 2. CAU       |     | 89 |      |      |   |     |   |      |     |   |   |   |   |   |  |
|                      | Medical       |        | Major    |              |     |    |      |      |   |     |   |      |     |   |   |   |   |   |  |
|                      | college and   | Older  | depressi |              |     |    |      |      |   |     |   |      |     |   |   |   |   |   |  |
| Mohr, Carmody,       | Clinical      | Adults | on       | 1. CBT       | Ind | 39 | 78.8 | 0    | 0 | 0   | 0 | 21.2 | USA | - | - | + | + | 2 |  |
| Erickson et al.,     |               |        |          | 2. CAU       |     | 38 |      |      |   |     |   |      |     |   |   |   |   |   |  |
| 2011                 | Medical       |        | Other    |              |     |    |      |      |   |     |   |      |     |   |   |   |   |   |  |
|                      | college and   | Older  | definiti |              |     |    |      |      |   |     |   |      |     |   |   |   |   |   |  |
| Mossey, Knott,       | hospital      | adults | on       | 1. IPT       | Ind | 31 | 45   | 55   | 0 | 0   | 0 | 0    | USA | - | - | + | - | 1 |  |
| Higgins et al., 1996 |               |        |          |              |     |    |      |      |   |     |   |      |     |   |   |   |   |   |  |

|                                                       |                                                       |                      |                         |                                                     |     |    |      |     |    |     |     |     |     |   |   |   |   |   |
|-------------------------------------------------------|-------------------------------------------------------|----------------------|-------------------------|-----------------------------------------------------|-----|----|------|-----|----|-----|-----|-----|-----|---|---|---|---|---|
|                                                       |                                                       |                      |                         | 2. CAU                                              |     | 38 |      |     |    |     |     |     |     |   |   |   |   |   |
| Mulcahy, Reavy,<br>Wilkinson et al.,<br>2010          | Clinical                                              | Women<br>with<br>PPD | Major<br>depressi<br>on | 1. IPT<br>2. CAU                                    | Grp | 23 | 86   | 0   | 0  | 0   | 0   | 14  | AU  | + | + | + | - | 3 |
|                                                       |                                                       |                      |                         |                                                     |     | 27 |      |     |    |     |     |     |     |   |   |   |   |   |
| Murphy, Carney,<br>Knesevich et al.,<br>1995          | Community                                             | Adults               | Major<br>depressi<br>on | 1. CBT<br>2.<br>Relaxation<br>training<br>(control) | Ind | 11 | 97.3 | 2.7 | 0  | 0   | 0   | 0   | USA | - | - | - | - | 0 |
|                                                       |                                                       |                      |                         |                                                     |     | 13 |      |     |    |     |     |     |     |   |   |   |   |   |
| Mynors-Wallis,<br>Gath, Lloyd-<br>Thomas et al., 1995 | Clinical                                              | Adults               | Major<br>depressi<br>on | 1. PST<br>2. PBO                                    | Ind | 29 | 95.6 | 0   | 0  | 0   | 0   | 4.4 | UK  | + | + | + | + | 4 |
|                                                       |                                                       |                      |                         |                                                     |     | 26 |      |     |    |     |     |     |     |   |   |   |   |   |
| Neugebauer, Kline,<br>Markowitz et al.,<br>2006       | Other                                                 | Other                | Other<br>definiti<br>on | 1. IPT<br>2. CAU                                    | Ind | 10 | 21   | 0   | 16 | 63  | 0   | 0   | USA | - | - | - | + | 1 |
|                                                       |                                                       |                      |                         |                                                     |     | 9  |      |     |    |     |     |     |     |   |   |   |   |   |
| O'Hara, Stuart,<br>Gorman et al., 2000                | Letters to<br>targetgroup in<br>specific<br>countries | Women<br>with<br>PPD | Major<br>depressi<br>on | 1. IPT<br>2. Waiting-                               | Ind | 48 | 96.7 | 0   | 0  | 0.8 | 0.8 | 1.7 | USA | + | - | - | + | 2 |
|                                                       |                                                       |                      |                         |                                                     |     | 51 |      |     |    |     |     |     |     |   |   |   |   |   |

|                                                     |           |                    |                         | list                                                                                                         |     |    |      |      |     |     |   |     |     |   |   |   |   |   |
|-----------------------------------------------------|-----------|--------------------|-------------------------|--------------------------------------------------------------------------------------------------------------|-----|----|------|------|-----|-----|---|-----|-----|---|---|---|---|---|
| Ransom, Heckman,<br>Anderson et al.,<br>2008        | Community | General<br>medical | Mood<br>disorder        | 1. IPT<br>2. CAU                                                                                             | Ind | 31 | 77   | 13   | 0   | 9   | 1 | 0   | USA | - | - | + | + | 2 |
| Rohan, Roecklein,<br>Tierny Lindsey et<br>al., 2007 | Community | Adults             | Major<br>depressi<br>on | 1. CBT<br>2. CBT+LT<br>3. Waiting-<br>list                                                                   | Grp | 15 | 78.7 | 11.5 | 4.9 | 3.3 | 0 | 1.6 | USA | - | - | + | + | 2 |
| Safren, O'Cleirigh,<br>Tan et al., 2009             | Community | General<br>medical | Mood<br>disorder        | 1. CBT<br>2. WL                                                                                              | Ind | 23 | 51   | 31   | 0   | 18  | 7 | 0   | USA | + | + | + | + | 4 |
| Schmidt & Miller,<br>1983                           | Community | Adults             | Other<br>definiti<br>on | 1. CBT<br>(individual)<br>2. CBT<br>(small<br>group)<br>3. CBT<br>(large<br>group)<br>4. CBT<br>(bibliothera | Ind | 12 | 86   | 0    | 0   | 0   | 0 | 14  | USA | - | - | + | - | 1 |

|                                                |           |                 |                         | py)                                       |     |                |      |     |   |   |   |      |     |   |   |   |   |   |
|------------------------------------------------|-----------|-----------------|-------------------------|-------------------------------------------|-----|----------------|------|-----|---|---|---|------|-----|---|---|---|---|---|
|                                                |           |                 |                         | 5. Waiting-                               |     |                |      |     |   |   |   |      |     |   |   |   |   |   |
|                                                |           |                 |                         | list                                      |     |                |      |     |   |   |   |      |     |   |   |   |   |   |
|                                                |           |                 |                         | 10                                        |     |                |      |     |   |   |   |      |     |   |   |   |   |   |
|                                                |           |                 |                         | Major                                     |     |                |      |     |   |   |   |      |     |   |   |   |   |   |
|                                                |           |                 |                         | depressi                                  |     |                |      |     |   |   |   |      |     |   |   |   |   |   |
|                                                |           |                 |                         | on                                        |     |                |      |     |   |   |   |      |     |   |   |   |   |   |
|                                                |           |                 |                         | 1. IPT                                    |     |                |      |     |   |   |   |      |     |   |   |   |   |   |
|                                                |           |                 |                         | Ind                                       |     |                |      |     |   |   |   |      |     |   |   |   |   |   |
|                                                |           |                 |                         | 93                                        |     |                |      |     |   |   |   |      |     |   |   |   |   |   |
|                                                |           |                 |                         | 55.1                                      |     |                |      |     |   |   |   |      |     |   |   |   |   |   |
|                                                |           |                 |                         | 0                                         |     |                |      |     |   |   |   |      |     |   |   |   |   |   |
|                                                |           |                 |                         | 0                                         |     |                |      |     |   |   |   |      |     |   |   |   |   |   |
|                                                |           |                 |                         | 0                                         |     |                |      |     |   |   |   |      |     |   |   |   |   |   |
|                                                |           |                 |                         | 0                                         |     |                |      |     |   |   |   |      |     |   |   |   |   |   |
|                                                |           |                 |                         | 44.9                                      |     |                |      |     |   |   |   |      |     |   |   |   |   |   |
|                                                |           |                 |                         | USA                                       |     |                |      |     |   |   |   |      |     |   |   |   |   |   |
|                                                |           |                 |                         | -                                         |     |                |      |     |   |   |   |      |     |   |   |   |   |   |
|                                                |           |                 |                         | -                                         |     |                |      |     |   |   |   |      |     |   |   |   |   |   |
|                                                |           |                 |                         | +                                         |     |                |      |     |   |   |   |      |     |   |   |   |   |   |
|                                                |           |                 |                         | +                                         |     |                |      |     |   |   |   |      |     |   |   |   |   |   |
|                                                |           |                 |                         | 2                                         |     |                |      |     |   |   |   |      |     |   |   |   |   |   |
|                                                |           |                 |                         | 2. CAU                                    |     |                |      |     |   |   |   |      |     |   |   |   |   |   |
|                                                |           |                 |                         | 92                                        |     |                |      |     |   |   |   |      |     |   |   |   |   |   |
|                                                |           |                 |                         | Older                                     |     |                |      |     |   |   |   |      |     |   |   |   |   |   |
|                                                |           |                 |                         | Mood                                      |     |                |      |     |   |   |   |      |     |   |   |   |   |   |
|                                                |           |                 |                         | disorder                                  |     |                |      |     |   |   |   |      |     |   |   |   |   |   |
|                                                |           |                 |                         | 1. CBT                                    |     |                |      |     |   |   |   |      |     |   |   |   |   |   |
|                                                |           |                 |                         | Ind                                       |     |                |      |     |   |   |   |      |     |   |   |   |   |   |
|                                                |           |                 |                         | 64                                        |     |                |      |     |   |   |   |      |     |   |   |   |   |   |
|                                                |           |                 |                         | 94.1                                      |     |                |      |     |   |   |   |      |     |   |   |   |   |   |
|                                                |           |                 |                         | 2.9                                       |     |                |      |     |   |   |   |      |     |   |   |   |   |   |
|                                                |           |                 |                         | 1                                         |     |                |      |     |   |   |   |      |     |   |   |   |   |   |
|                                                |           |                 |                         | 0                                         |     |                |      |     |   |   |   |      |     |   |   |   |   |   |
|                                                |           |                 |                         | 0                                         |     |                |      |     |   |   |   |      |     |   |   |   |   |   |
|                                                |           |                 |                         | 2                                         |     |                |      |     |   |   |   |      |     |   |   |   |   |   |
|                                                |           |                 |                         | UK                                        |     |                |      |     |   |   |   |      |     |   |   |   |   |   |
|                                                |           |                 |                         | +                                         |     |                |      |     |   |   |   |      |     |   |   |   |   |   |
|                                                |           |                 |                         | +                                         |     |                |      |     |   |   |   |      |     |   |   |   |   |   |
|                                                |           |                 |                         | +                                         |     |                |      |     |   |   |   |      |     |   |   |   |   |   |
|                                                |           |                 |                         | +                                         |     |                |      |     |   |   |   |      |     |   |   |   |   |   |
|                                                |           |                 |                         | 4                                         |     |                |      |     |   |   |   |      |     |   |   |   |   |   |
|                                                |           |                 |                         | 2. CAU                                    |     |                |      |     |   |   |   |      |     |   |   |   |   |   |
|                                                |           |                 |                         | 55                                        |     |                |      |     |   |   |   |      |     |   |   |   |   |   |
|                                                |           |                 |                         | 3. Talking                                |     |                |      |     |   |   |   |      |     |   |   |   |   |   |
|                                                |           |                 |                         | control                                   |     |                |      |     |   |   |   |      |     |   |   |   |   |   |
|                                                |           |                 |                         | 58                                        |     |                |      |     |   |   |   |      |     |   |   |   |   |   |
|                                                |           |                 |                         | Other                                     |     |                |      |     |   |   |   |      |     |   |   |   |   |   |
|                                                |           |                 |                         | definiti                                  |     |                |      |     |   |   |   |      |     |   |   |   |   |   |
|                                                |           |                 |                         | on                                        |     |                |      |     |   |   |   |      |     |   |   |   |   |   |
|                                                |           |                 |                         | 1. BAT                                    |     |                |      |     |   |   |   |      |     |   |   |   |   |   |
|                                                |           |                 |                         | Ind                                       |     |                |      |     |   |   |   |      |     |   |   |   |   |   |
|                                                |           |                 |                         | 16                                        |     |                |      |     |   |   |   |      |     |   |   |   |   |   |
|                                                |           |                 |                         | 60                                        |     |                |      |     |   |   |   |      |     |   |   |   |   |   |
|                                                |           |                 |                         | 32                                        |     |                |      |     |   |   |   |      |     |   |   |   |   |   |
|                                                |           |                 |                         | 0                                         |     |                |      |     |   |   |   |      |     |   |   |   |   |   |
|                                                |           |                 |                         | 0                                         |     |                |      |     |   |   |   |      |     |   |   |   |   |   |
|                                                |           |                 |                         | 2                                         |     |                |      |     |   |   |   |      |     |   |   |   |   |   |
|                                                |           |                 |                         | 6                                         |     |                |      |     |   |   |   |      |     |   |   |   |   |   |
|                                                |           |                 |                         | USA                                       |     |                |      |     |   |   |   |      |     |   |   |   |   |   |
|                                                |           |                 |                         | -                                         |     |                |      |     |   |   |   |      |     |   |   |   |   |   |
|                                                |           |                 |                         | -                                         |     |                |      |     |   |   |   |      |     |   |   |   |   |   |
|                                                |           |                 |                         | -                                         |     |                |      |     |   |   |   |      |     |   |   |   |   |   |
|                                                |           |                 |                         | +                                         |     |                |      |     |   |   |   |      |     |   |   |   |   |   |
|                                                |           |                 |                         | 1                                         |     |                |      |     |   |   |   |      |     |   |   |   |   |   |
|                                                |           |                 |                         | 2. CAU                                    |     |                |      |     |   |   |   |      |     |   |   |   |   |   |
|                                                |           |                 |                         | 13                                        |     |                |      |     |   |   |   |      |     |   |   |   |   |   |
|                                                |           |                 |                         | Major                                     |     |                |      |     |   |   |   |      |     |   |   |   |   |   |
|                                                |           |                 |                         | depressi                                  |     |                |      |     |   |   |   |      |     |   |   |   |   |   |
|                                                |           |                 |                         | on                                        |     |                |      |     |   |   |   |      |     |   |   |   |   |   |
|                                                |           |                 |                         | 1. IPT                                    |     |                |      |     |   |   |   |      |     |   |   |   |   |   |
|                                                |           |                 |                         | Ind                                       |     |                |      |     |   |   |   |      |     |   |   |   |   |   |
|                                                |           |                 |                         | 19                                        |     |                |      |     |   |   |   |      |     |   |   |   |   |   |
|                                                |           |                 |                         | 28.9                                      |     |                |      |     |   |   |   |      |     |   |   |   |   |   |
|                                                |           |                 |                         | 5.3                                       |     |                |      |     |   |   |   |      |     |   |   |   |   |   |
|                                                |           |                 |                         | 0                                         |     |                |      |     |   |   |   |      |     |   |   |   |   |   |
|                                                |           |                 |                         | 8                                         |     |                |      |     |   |   |   |      |     |   |   |   |   |   |
|                                                |           |                 |                         | 0                                         |     |                |      |     |   |   |   |      |     |   |   |   |   |   |
|                                                |           |                 |                         | 0                                         |     |                |      |     |   |   |   |      |     |   |   |   |   |   |
|                                                |           |                 |                         | 65.                                       |     |                |      |     |   |   |   |      |     |   |   |   |   |   |
|                                                |           |                 |                         | 0                                         |     |                |      |     |   |   |   |      |     |   |   |   |   |   |
|                                                |           |                 |                         | USA                                       |     |                |      |     |   |   |   |      |     |   |   |   |   |   |
|                                                |           |                 |                         | +                                         |     |                |      |     |   |   |   |      |     |   |   |   |   |   |
|                                                |           |                 |                         | -                                         |     |                |      |     |   |   |   |      |     |   |   |   |   |   |
|                                                |           |                 |                         | -                                         |     |                |      |     |   |   |   |      |     |   |   |   |   |   |
|                                                |           |                 |                         | +                                         |     |                |      |     |   |   |   |      |     |   |   |   |   |   |
|                                                |           |                 |                         | +                                         |     |                |      |     |   |   |   |      |     |   |   |   |   |   |
|                                                |           |                 |                         | 2                                         |     |                |      |     |   |   |   |      |     |   |   |   |   |   |
|                                                |           |                 |                         | 2. PEP                                    |     |                |      |     |   |   |   |      |     |   |   |   |   |   |
|                                                |           |                 |                         | (control)                                 |     |                |      |     |   |   |   |      |     |   |   |   |   |   |
|                                                |           |                 |                         | 19                                        |     |                |      |     |   |   |   |      |     |   |   |   |   |   |
|                                                |           |                 |                         | Major                                     |     |                |      |     |   |   |   |      |     |   |   |   |   |   |
|                                                |           |                 |                         | depressi                                  |     |                |      |     |   |   |   |      |     |   |   |   |   |   |
|                                                |           |                 |                         | 1. IPT                                    |     |                |      |     |   |   |   |      |     |   |   |   |   |   |
|                                                |           |                 |                         | Ind                                       |     |                |      |     |   |   |   |      |     |   |   |   |   |   |
|                                                |           |                 |                         | 24                                        |     |                |      |     |   |   |   |      |     |   |   |   |   |   |
|                                                |           |                 |                         | 79                                        |     |                |      |     |   |   |   |      |     |   |   |   |   |   |
|                                                |           |                 |                         | 0                                         |     |                |      |     |   |   |   |      |     |   |   |   |   |   |
|                                                |           |                 |                         | 0                                         |     |                |      |     |   |   |   |      |     |   |   |   |   |   |
|                                                |           |                 |                         | 0                                         |     |                |      |     |   |   |   |      |     |   |   |   |   |   |
|                                                |           |                 |                         | 0                                         |     |                |      |     |   |   |   |      |     |   |   |   |   |   |
|                                                |           |                 |                         | 21                                        |     |                |      |     |   |   |   |      |     |   |   |   |   |   |
|                                                |           |                 |                         | USA                                       |     |                |      |     |   |   |   |      |     |   |   |   |   |   |
|                                                |           |                 |                         | -                                         |     |                |      |     |   |   |   |      |     |   |   |   |   |   |
|                                                |           |                 |                         | -                                         |     |                |      |     |   |   |   |      |     |   |   |   |   |   |
|                                                |           |                 |                         | +                                         |     |                |      |     |   |   |   |      |     |   |   |   |   |   |
|                                                |           |                 |                         | +                                         |     |                |      |     |   |   |   |      |     |   |   |   |   |   |
|                                                |           |                 |                         | 2                                         |     |                |      |     |   |   |   |      |     |   |   |   |   |   |
| Schulberg, Block,<br>Madonia et al.,<br>1996   | Clinical  | Adults          | Major<br>depressi<br>on | 1. IPT<br>2. CAU                          | Ind | 93<br>92       | 55.1 | 0   | 0 | 0 | 0 | 44.9 | USA | - | - | + | + | 2 |
| Serfaty, Haworth,<br>Blanchard et al.,<br>2009 | Community | Older<br>adults | Mood<br>disorder        | 1. CBT<br>2. CAU<br>3. Talking<br>control | Ind | 64<br>55<br>58 | 94.1 | 2.9 | 1 | 0 | 0 | 2    | UK  | + | + | + | + | 4 |
| Snarski, Scogin,<br>DiNapoli et al.,<br>2011   | Clinical  | Older<br>adults | Other<br>definiti<br>on | 1. BAT<br>2. CAU                          | Ind | 16<br>13       | 60   | 32  | 0 | 0 | 2 | 6    | USA | - | - | - | + | 1 |
| Spinelli & Endicott,<br>2003                   | Clinical  | Other           | Major<br>depressi<br>on | 1. IPT<br>2. PEP<br>(control)             | Ind | 19<br>19       | 28.9 | 5.3 | 0 | 8 | 0 | 0    | USA | + | - | - | + | 2 |
| Swartz, Frank,<br>Zuckoff et al., 2008         | Community | Other           | Major<br>depressi       | 1. IPT                                    | Ind | 24             | 79   | 0   | 0 | 0 | 0 | 21   | USA | - | - | + | + | 2 |



|                     |               |         |          |             |     |    |      |      |   |   |   |     |     |   |   |   |   |   |
|---------------------|---------------|---------|----------|-------------|-----|----|------|------|---|---|---|-----|-----|---|---|---|---|---|
|                     |               |         | on       |             |     |    |      |      |   |   |   |     |     |   |   |   |   |   |
|                     |               |         |          | 2. CAU      |     | 18 |      |      |   |   |   |     |     |   |   |   |   |   |
|                     |               |         | Major    |             |     |    |      |      |   |   |   |     |     |   |   |   |   |   |
| Talbot, Chaudron,   |               |         | depressi |             |     |    |      |      |   |   |   |     |     |   |   |   |   |   |
| Ward et al., 2011   | Clinical      | Other   | on       | 1. IPT      | Ind | 34 | 58.6 | 41.4 | 0 | 0 | 0 | 0   | USA | - | - | - | + | 1 |
|                     |               |         |          | 2. CAU      |     | 24 |      |      |   |   |   |     |     |   |   |   |   |   |
| Taylor, Conrad,     | Clinics and   |         | Other    |             |     |    |      |      |   |   |   |     |     |   |   |   |   |   |
| Wilhelm et al.,     | advertisement | General | definiti |             |     |    |      |      |   |   |   |     |     |   |   |   |   |   |
| 2009                | s             | medical | on       | 1. CBT      | Ind | 19 | 95.8 | 0    | 0 | 0 | 0 | 4.2 | USA | - | - | + | + | 2 |
|                     |               |         |          | 2. Waiting- |     |    |      |      |   |   |   |     |     |   |   |   |   |   |
|                     |               |         |          | list        |     | 21 |      |      |   |   |   |     |     |   |   |   |   |   |
| van Bastelaar,      |               |         | Other    |             |     |    |      |      |   |   |   |     |     |   |   |   |   |   |
| Pouwer, Cuijpers et |               | General | definiti |             |     | 12 |      |      |   |   |   |     |     |   |   |   |   |   |
| al., 2011           | Community     | medical | on       | 1. CBT      | Grp | 5  | 89   | 0    | 0 | 0 | 0 | 11  | NL  | + | + | + | + | 4 |
|                     |               |         |          | 2. Waiting- |     | 13 |      |      |   |   |   |     |     |   |   |   |   |   |
|                     |               |         |          | list        |     | 0  |      |      |   |   |   |     |     |   |   |   |   |   |
| Warmerdam, van      |               |         | Other    |             |     |    |      |      |   |   |   |     |     |   |   |   |   |   |
| Straten, Twisk et   |               |         | definiti |             |     |    |      |      |   |   |   |     |     |   |   |   |   |   |
| al., 2008           | Community     | Adults  | on       | 1. CBT      | Grp | 88 | 92.4 | 0    | 0 | 0 | 0 | 7.6 | NL  | + | + | + | + | 4 |
|                     |               |         |          | 2. PST      |     | 88 |      |      |   |   |   |     |     |   |   |   |   |   |
|                     |               |         |          | 3. Waiting- |     |    |      |      |   |   |   |     |     |   |   |   |   |   |
|                     |               |         |          | list        |     | 87 |      |      |   |   |   |     |     |   |   |   |   |   |
|                     |               | Women   | Other    |             |     |    |      |      |   |   |   |     |     |   |   |   |   |   |
| Wiklund, Mohlkert   | Maternity     | with    | definiti |             |     |    |      |      |   |   |   |     |     |   |   |   |   |   |
| & Edman, 2010       | clinic        | PPD     | on       | 1. CBT      | Ind | 33 | 91   | 0    | 0 | 0 | 0 | 9   | SE  | - | - | + | - | 1 |
